# Supplementary material for: Clinical impact of the use of chronic suppressive antibiotics against recurrent ventricular assist device infections
Source: PubMed Central journal article supplement (PMC11537063; doi:10.1128/spectrum.00398-24), 2024-10-04

## **Supplementary Table and Figure Legends**

**Supplementary Table 1.** List of microorganisms and chronic suppressive antibiotics in ventricular assist device infection

CNS: coagulase negative staphylococci, MSSA: methicillin susceptible *Staphylococcus aureus*, MRSE: methicillin resistant *Staphylococcus epidermidis*, MRSA: methicillin resistant *Staphylococcus aureus*, MDRP: multidrug resistant *Pseudomonas aeruginosa*, ESBL: extended spectrum beta lactamase.

ST: sulfamethoxazole/trimethoprim, CCL: cefaclor, LVFX: levofloxacin.

VAD: ventricular assist device, VADI: ventricular assist device infection, CSA: chronic suppressive antibiotics.

a CSA was started with ST and RFP, and was later changed to RFP alone at treating physician's discretion.

**Supplementary Figure 1.** Time flow of the observation period of VADI in this study.

VAD: Ventricular assist device

VADI: Ventricular assist device infection

CSA: Chronic suppressive antibiotics

**Supplementary Figure 2.** Summary of all ventricular assist device infection cases with or without chronic suppressive antibiotics.

CSA: Chronic suppressive antibiotics

**Supplementary Figure 3.** Breakdown of causative microorganisms in second ventricular assist device infection cases

MSSA: methicillin susceptible *Staphylococcus aureus*

MRSA: methicillin resistant *Staphylococcus aureus*

P.aeruginosa: *Pseudomonas aeruginosa*

ST: sulfamethoxazole/trimethoprim

VADI: Ventricular assist device infection

CSA: Chronic suppressive antibiotics

Supplementary Table 1. List of microorganisms and chronic suppressive antibiotics in ventricular assist device infection

| First VADI                 | CSA                     | Recurrent VADI                         |
|----------------------------|-------------------------|----------------------------------------|
| CNS                        | ST                      | No recurrence                          |
| MRSE                       | ST                      | MSSA                                   |
| MSSA                       | CCL                     | No recurrence                          |
| <i>Serratia marcescens</i> | ST (ineffective)        | No recurrence                          |
| MSSA                       | CCL                     | No recurrence                          |
| MSSA                       | ST                      | No recurrence                          |
| MRSE                       | Minocycline             | No recurrence                          |
| MRSA                       | Rifampicin <sup>a</sup> | No recurrence                          |
| MSSA                       | CCL                     | No recurrence                          |
| MSSA                       | CCL                     | No recurrence                          |
| MSSA                       | CCL                     | No recurrence                          |
| MSSA                       | CCL                     | No recurrence                          |
| MSSA                       | CCL                     | No recurrence                          |
| MSSA                       | Amoxicillin             | No recurrence                          |
| MSSA                       | CCL                     | No recurrence                          |
| MSSA                       | CCL                     | No recurrence                          |
| MSSA                       | CCL                     | No recurrence                          |
| MRSA                       | ST                      | No recurrence                          |
| MSSA                       | CCL                     | No recurrence                          |
| MSSA                       | CCL                     | <i>Staphylococcus hominis, capitis</i> |
| MSSA                       | CCL                     | MSSA                                   |
| MSSA                       | CCL                     | No recurrence                          |
| MRSA                       | ST                      | No recurrence                          |
| MSSA                       | CCL                     | No recurrence                          |
| <i>Citrobacter species</i> | CCL (ineffective)       | <i>Peptostreptococcus species</i>      |
| MSSA                       | CCL                     | No recurrence                          |
| MRSA                       | ST                      | MRSA                                   |
| MSSA                       | CCL                     | MSSA                                   |

|                                                      |                  |                                        |
|------------------------------------------------------|------------------|----------------------------------------|
| MRSA                                                 | ST               | MRSA                                   |
| MSSA                                                 | CCL              | No recurrence                          |
| MRSA                                                 | ST               | MRSA                                   |
| MSSA                                                 | CCL              | MSSA                                   |
| MSSA                                                 | CCL and LVFX     | <i>Pseudomonas aeruginosa</i>          |
| MRSA                                                 | ST               | <i>Pseudomonas aeruginosa</i>          |
| <i>Pseudomonas aeruginosa</i>                        | ST (ineffective) | <i>Pseudomonas aeruginosa</i>          |
| MSSA                                                 | CCL              | MSSA                                   |
| MSSA                                                 | CCL              | No recurrence                          |
| <i>Pseudomonas aeruginosa</i>                        | LVFX             | <i>Pseudomonas aeruginosa</i>          |
| MSSA                                                 | CCL              | MSSA                                   |
| MSSA                                                 |                  | No recurrence                          |
| <i>Citrobacter koseri</i>                            |                  | No recurrence                          |
| MSSA                                                 |                  | No recurrence                          |
| CNS                                                  |                  | No recurrence                          |
| MSSA                                                 |                  | MSSA                                   |
| <i>Pseudomonas aeruginosa</i>                        |                  | No recurrence                          |
| <i>Pseudomonas aeruginosa</i>                        |                  | <i>Pseudomonas aeruginosa</i>          |
| <i>Enterobacter asburiae</i>                         |                  | No recurrence                          |
| MSSA                                                 |                  | Recurrence (no organism identified)    |
| MRSE                                                 |                  | MSSA                                   |
| MDRP                                                 |                  | MDRP                                   |
| <i>Corynebacterium</i> species                       |                  | No recurrence                          |
| MSSA                                                 |                  | MSSA                                   |
| <i>Pseudomonas aeruginosa</i>                        |                  | No recurrence                          |
| <i>Pseudomonas aeruginosa</i>                        |                  | <i>Pseudomonas aeruginosa</i>          |
| <i>Pseudomonas aeruginosa</i>                        |                  | <i>Enterobacter asburiae</i>           |
| MSSA                                                 |                  | <i>Streptococcus sanguinis</i>         |
| MRSE                                                 |                  | No recurrence                          |
| <i>Citrobacter koseri</i>                            |                  | Recurrence (no organism identified)    |
| <i>Pseudomonas aeruginosa</i><br>quinolone resistant |                  | ESBL producing <i>Escherichia coli</i> |

|                                       |  |                                                 |
|---------------------------------------|--|-------------------------------------------------|
| MSSA                                  |  | <i>Pseudomonas aeruginosa</i>                   |
| MSSA                                  |  | MSSA                                            |
| MSSA                                  |  | MSSA                                            |
| MSSA<br><i>Pseudomonas aeruginosa</i> |  | MSSA<br><i>Pseudomonas aeruginosa</i>           |
| <i>Pseudomonas aeruginosa</i>         |  | No recurrence                                   |
| MSSA                                  |  | No recurrence                                   |
| MSSA                                  |  | MSSA,<br><i>Enterobacter species</i>            |
| <i>Pseudomonas aeruginosa</i>         |  | MSSA<br><i>Pseudomonas aeruginosa</i>           |
| MSSA                                  |  | MSSA                                            |
| <i>Pseudomonas aeruginosa</i>         |  | <i>Pseudomonas aeruginosa</i>                   |
| MSSA                                  |  | MSSA                                            |
| <i>Pseudomonas aeruginosa</i>         |  | <i>Serratia marcescens</i>                      |
| MSSA                                  |  | MSSA                                            |
| <i>Enterobacter species</i>           |  | <i>Klebsiella species</i>                       |
| <i>Pseudomonas aeruginosa</i>         |  | ESBL producing<br><i>Pseudomonas aeruginosa</i> |
| <i>Pseudomonas aeruginosa</i>         |  | <i>Pseudomonas aeruginosa</i>                   |
| MSSA                                  |  | Recurrence (no organism identified)             |

# Supplementary Figure 1

First VADI

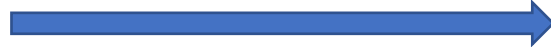

IV therapy

Observation period without CSA

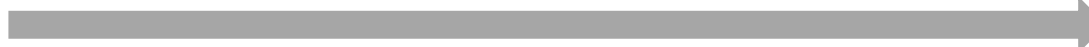

Observation period with CSA

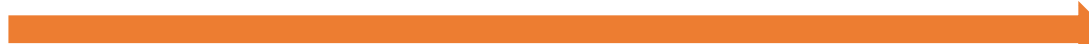

Recurrent VADI  
Transplantation\*  
Death \*  
VAD removal \*  
Observation end

\*Competing risk events

# Supplementary Figure 2

- ✕ Recurrent episode
- Observation period (days)
- ➡ Effective oral antibiotics
- ➡ Ineffective oral antibiotics
- Inpatient with IV therapy

Without CSA

With CSA

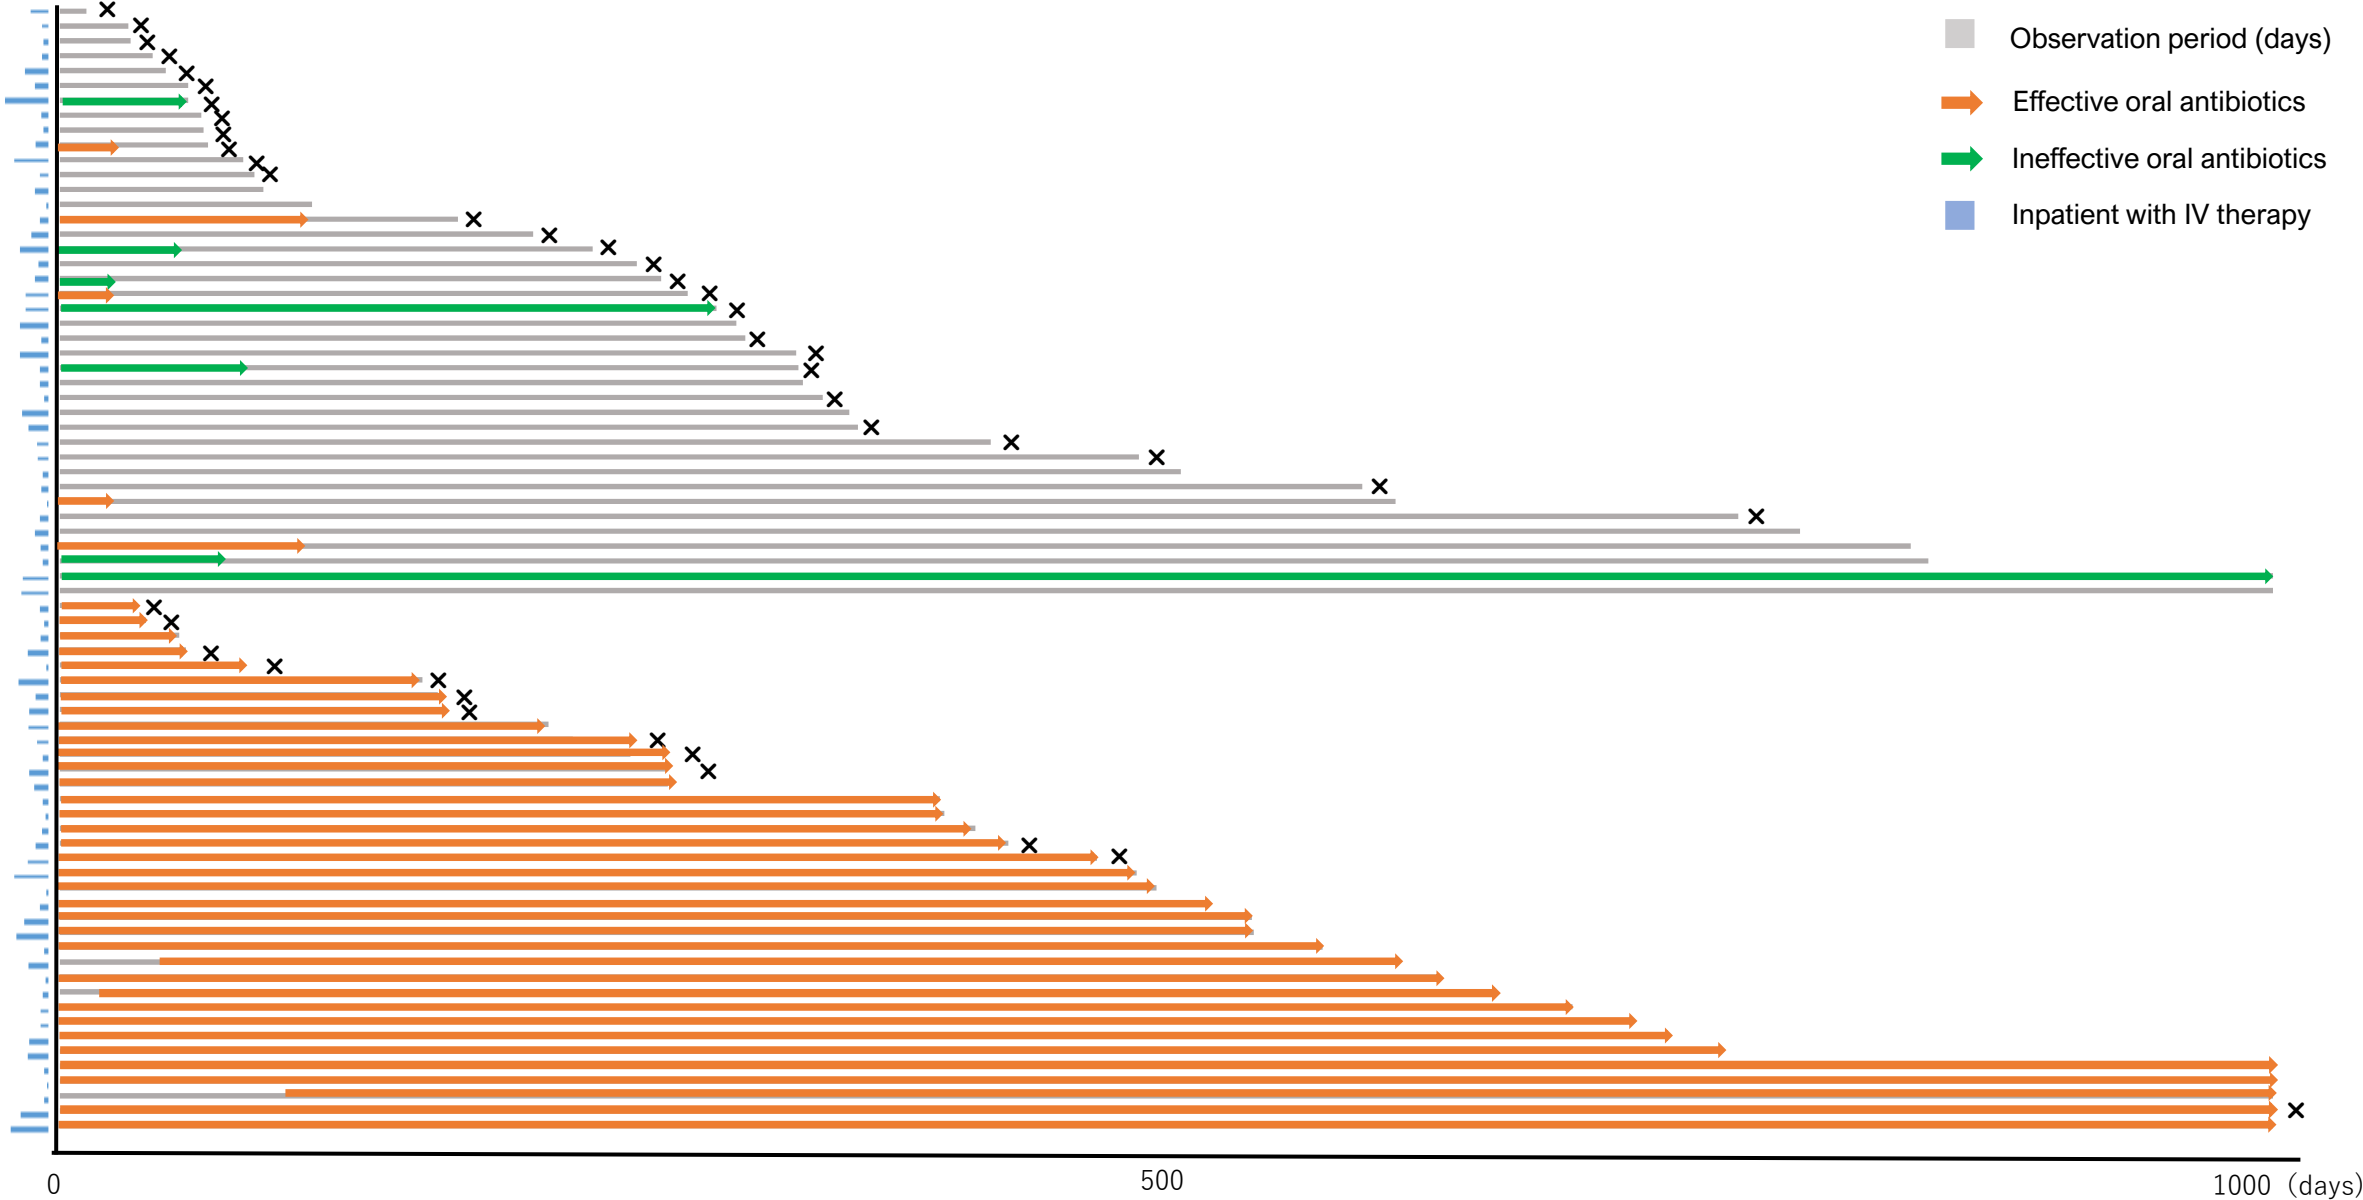

## Supplementary Figure 3

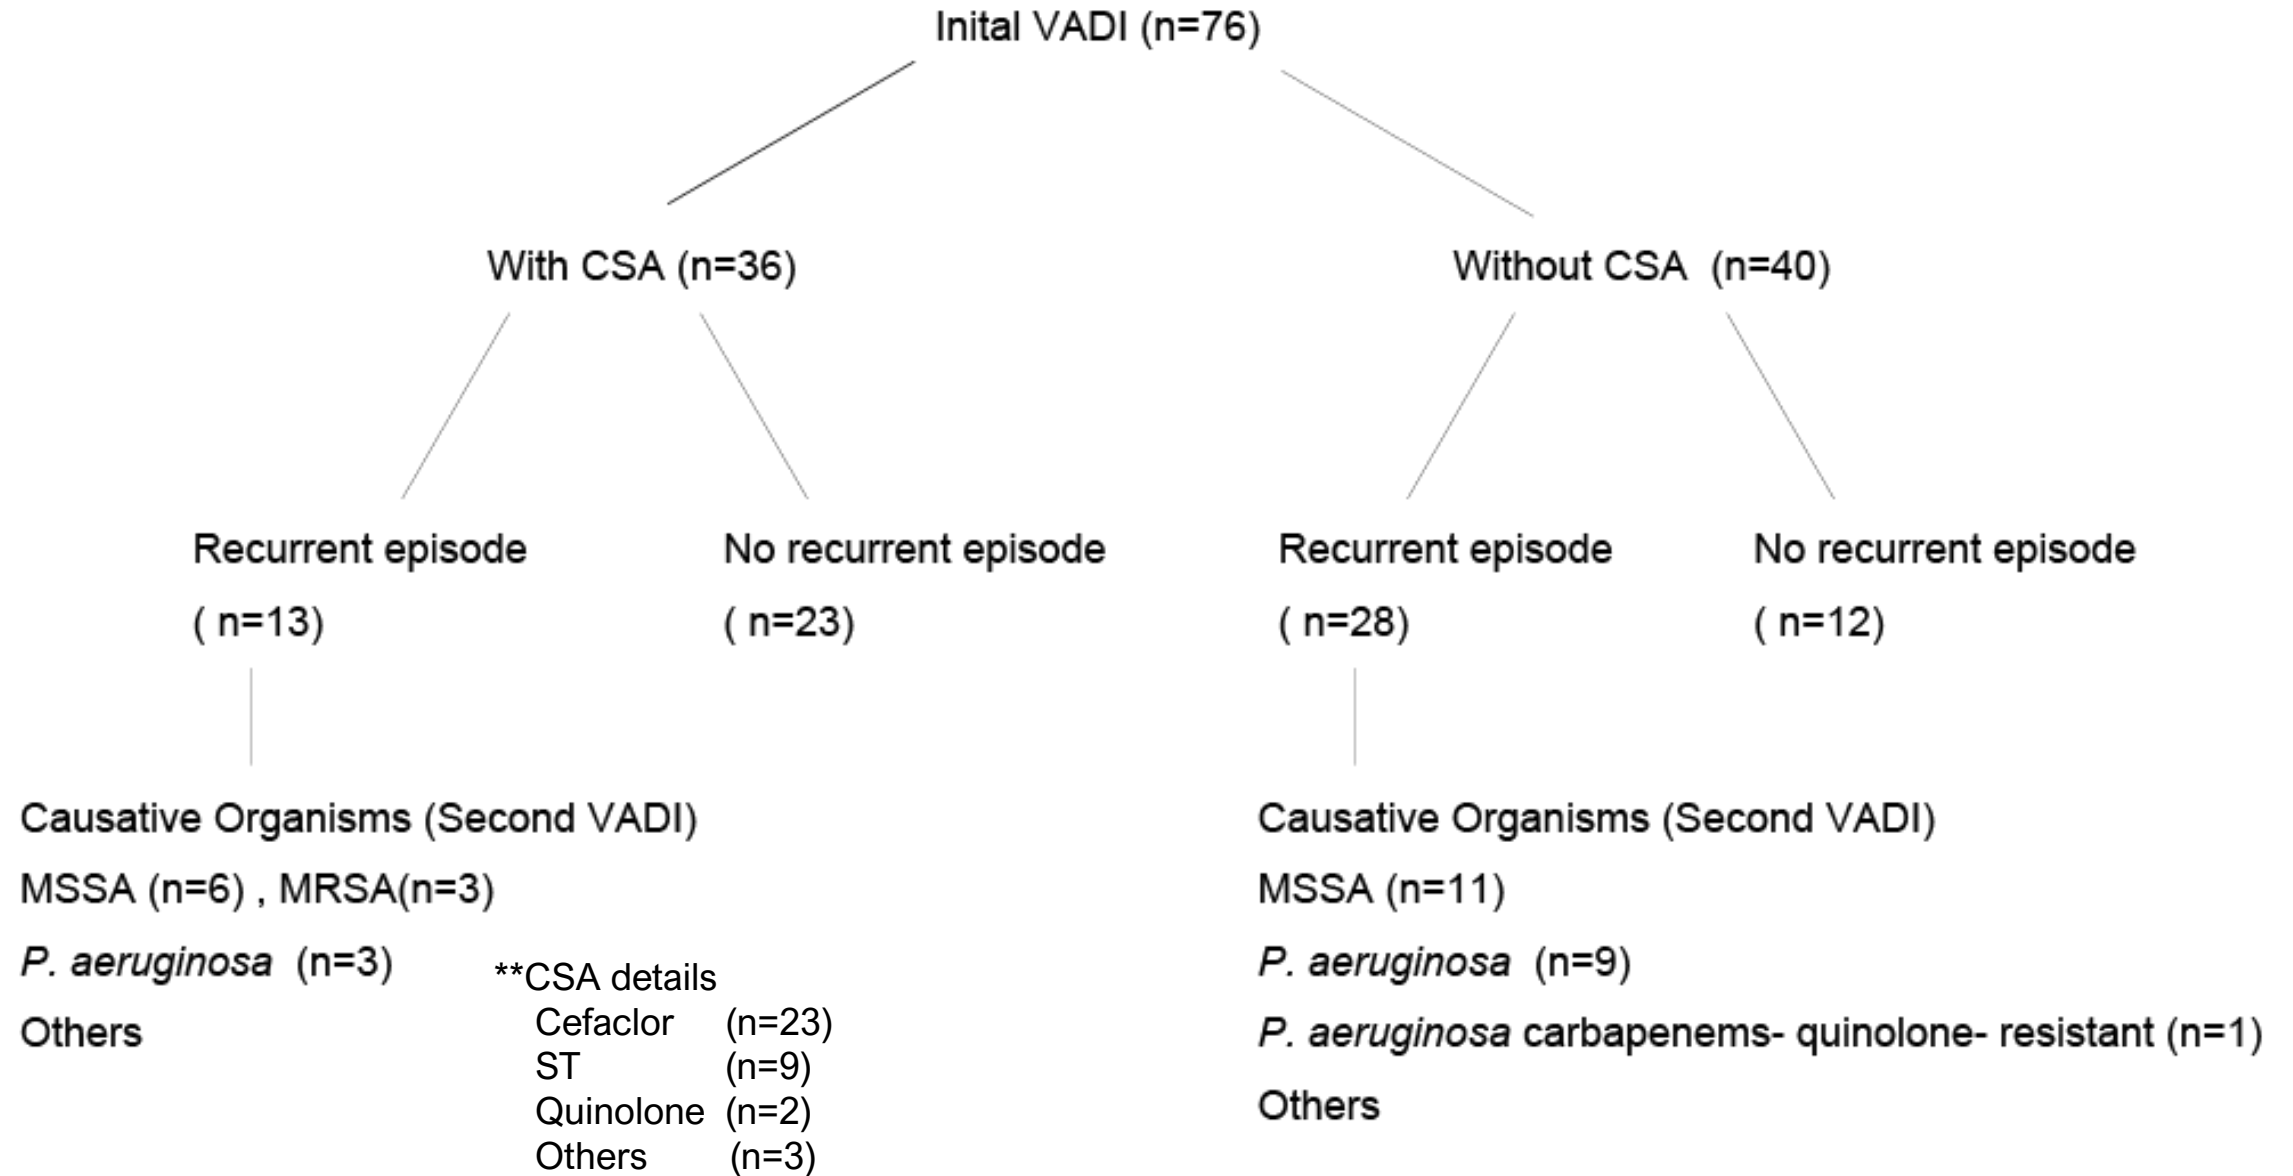

Supplement: spectrum.00398-24-s0001.pdf [file spectrum.00398-24-s0001.pdf]
